# Supplementary material for: The Two-Component System RsrS-RsrR Regulates the Tetrathionate Intermediate Pathway for Thiosulfate Oxidation in Acidithiobacillus caldus
Source: PubMed Central journal article supplement (PMC5093147; doi:10.3389/fmicb.2016.01755), 2016-11-03
Supplement: Image2.pdf [file Image2.pdf]

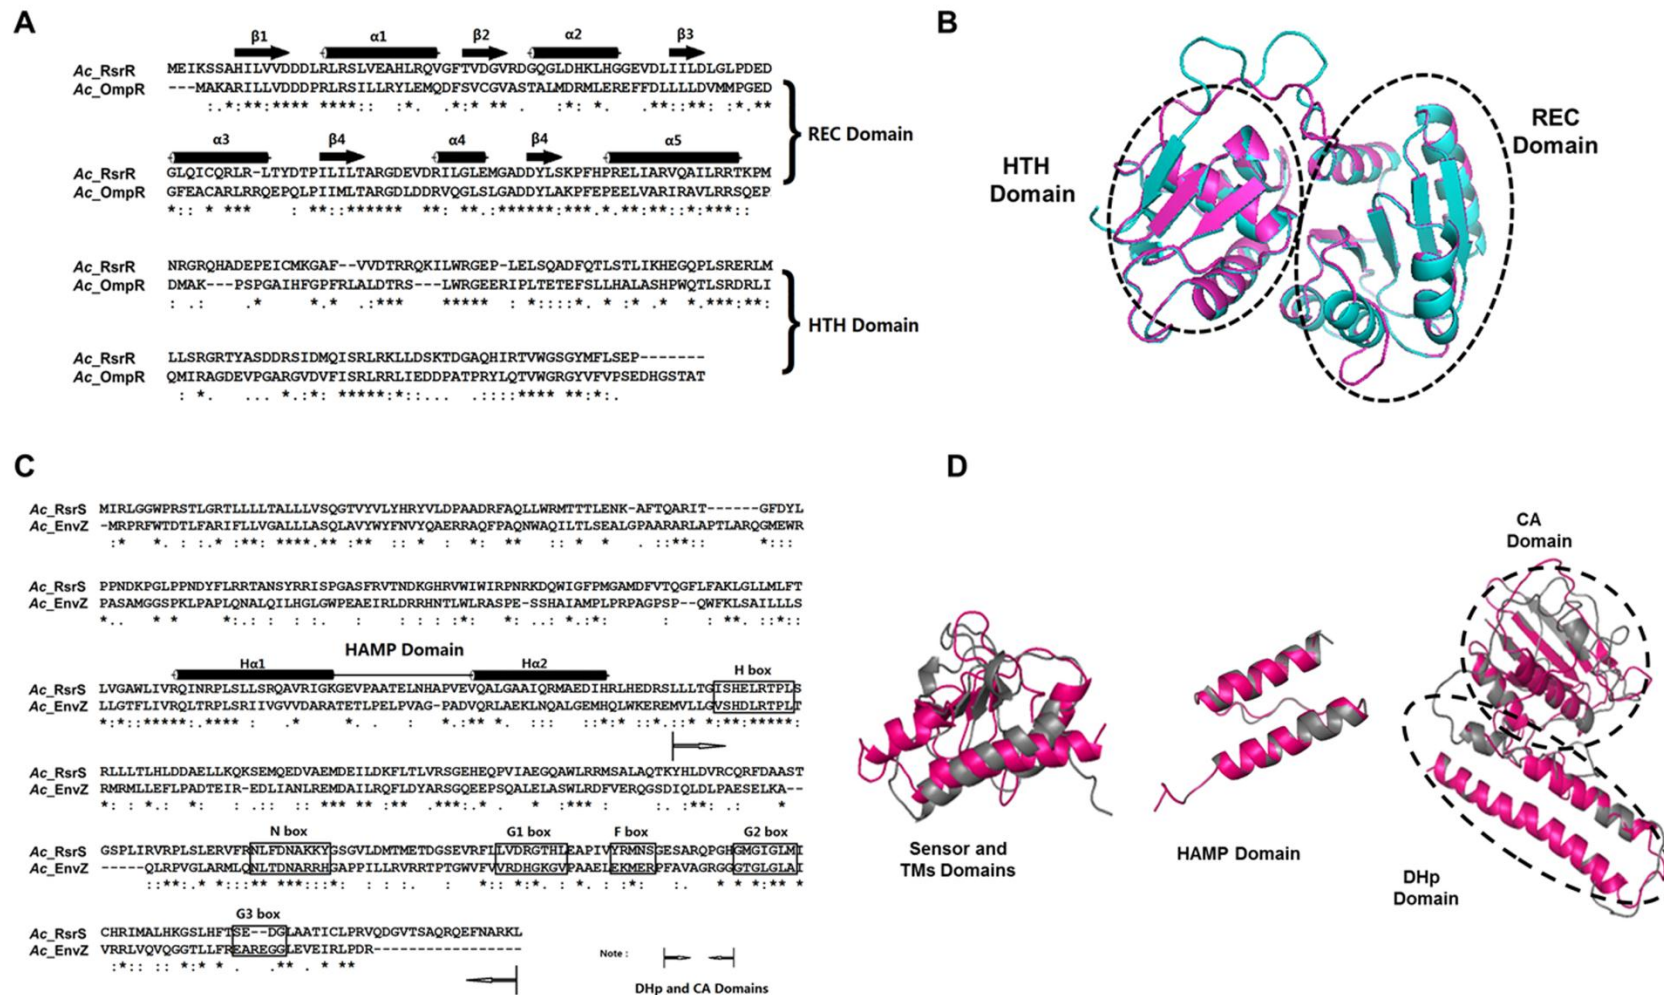

**Fig. S2. Amino acid sequence and protein structure analysis of RsrR and RsrS.** Every domain is shown in the figure. (A) Amino acid sequence alignment between RsrR and OmpR; (B) Amino acid sequence alignment between RsrS and EnvZ; (C) Protein structure fitting of RsrR and OmpR (blue for RsrR, red for OmpR); (D) Protein structure fitting of RsrS and EnvZ (grey for RsrS, red for EnvZ).
